# Supplementary material
Source: PubMed Central journal article supplement (PMC4296578)
Supplement: NIHMS621006-supplement-Supp_FigureS1.pdf [file NIHMS621006-supplement-Supp_FigureS1.pdf]

**Supplementary Material for:**  
**BDNF and Huntingtin protein modifications by Manganese: Implications for  
striatal medium spiny neuron pathology in manganese neurotoxicity**

Kirstie H. Stansfield<sup>1</sup>, Terry Jo Bichell<sup>2</sup>, Aaron B. Bowman<sup>2</sup>,  
and Tomás R. Guilarte<sup>1\*</sup>

<sup>1</sup>Department of Environmental Health Sciences, Mailman School of Public Health,  
Columbia University, New York, NY.

<sup>2</sup>Department of Neurology, Center for Molecular Toxicology and Vanderbilt Brain  
Institute, Vanderbilt University, Nashville, TN.

(\*) Correspondence to:  
Tomás R. Guilarte, PhD  
Department of Environmental Health Sciences  
Columbia University  
Mailman School of Public Health  
722 West 168th Street, Room 1105E  
New York, NY 10032  
Phone: [212-305-3959](tel:212-305-3959)  
Fax: [212-305-3857](tel:212-305-3857)  
E-mail: [trguilarte@columbia.edu](mailto:trguilarte@columbia.edu)

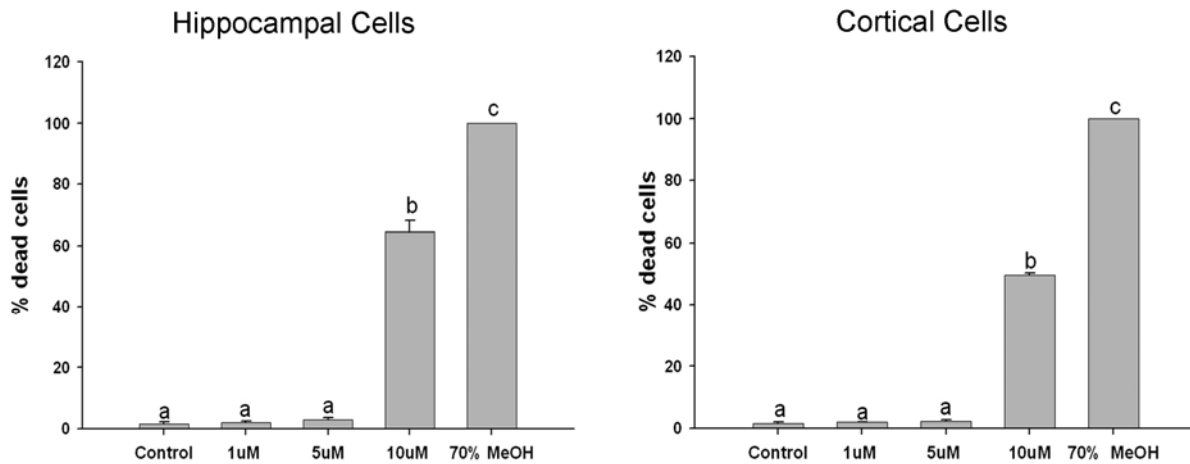

### Supplementary Figure 1.

Cytotoxicity of Mn and methanol (MeOH): Both 1 and 5  $\mu\text{M}$  of Mn were determined to be noncytotoxic in both hippocampal and cortical neurons based on the Live/Dead Viability/ Cytotoxicity assay. After exposure to 0, 1, 5 and 10  $\mu\text{M}$  Mn for 5 days *in vitro*, hippocampal cell viability (% dead cells) was  $1.5 \pm 0.6\%$ ,  $2.11 \pm 0.3\%$ ,  $3.07 \pm 0.4\%$  and  $64.5 \pm 3.5\%$ , respectively and for cortical cell viability was  $1.6 \pm 0.3\%$ ,  $2.0 \pm 0.1\%$ ,  $2.3 \pm 0.4\%$  and  $49.4 \pm 0.6\%$ , respectively. Cell viability after exposure to excitotoxic levels of methanol (70%) for 20 minutes, used as a positive control ( $n = 3$  independent assays).

### Methods for Supplementary Figure 1: LIVE/DEAD® Cell Viability Assay:

LIVE/DEAD® Cell Viability Assays were performed as per the manufacturer's instructions (Molecular Probes, Invitrogen). Briefly, hippocampal and cortical neurons were plated on glass coverslips at  $14,000 \text{ cells/cm}^2$ . Cells were exposed to vehicle, 1  $\mu\text{M}$ , 5  $\mu\text{M}$  or 10  $\mu\text{M}$  Mn for 5 days or to 70% methanol for 20 minutes as a positive cytotoxic control. After the exposure period, 100  $\mu\text{l}$  of the LIVE/DEAD reagents (2  $\mu\text{M}$  calcein AM and 4  $\mu\text{M}$  ethidium homodimer-1) were added to the coverslips for 30 min at RT. Coverslips were viewed under a fluorescent scope and number of live and dead cells were counted.
